# Supplementary material for: A green process for recycling and synthesis of cathode materials LiMn2O4from spent lithium-ion batteries using citric acid
Source: Royal Society of Chemistry journal article supplement (doi:10.1039/d2ra04391b), 2022-01-01
Supplement: d2ra04391b1.pdf [file d2ra04391b1.pdf]

## Supplementary Information

Junzhen Wang, Kui Huang\*, Haili Dong, Yuanhuan Lu, Kunjie Liu,

Zhangqing Chen, Xinke Shan, Guoliang Huang, Lin Wei

School of Resources, Environment and Materials, Guangxi University, 100 Daxue Road, Nanning

530004

Corresponding author: Kui, Huang; E-mail: [khuang@gxu.edu.cn](mailto:khuang@gxu.edu.cn).

### Summary Information:

Number of pages: 4

Tables: 2

Figures: 4

**Table S1** Chemical composition of cathode material LMO

| Elements | Li   | Mn    | Al  | Na    | Ca     | K      | Fe     |
|----------|------|-------|-----|-------|--------|--------|--------|
| Wt. %    | 3.78 | 64.75 | 0.9 | 0.005 | 0.0009 | 0.0007 | 0.0002 |

**Table S2** Lattice parameters of LMO600-800 sample

| Sample | a(Å)   | b(Å)   | c(Å)   | V(Å <sup>3</sup> ) |
|--------|--------|--------|--------|--------------------|
| LMO600 | 8.1845 | 8.1845 | 8.1845 | 548.25             |
| LMO700 | 8.2026 | 8.2026 | 8.2026 | 551.9              |
| LMO800 | 8.2302 | 8.2302 | 8.2302 | 557.75             |

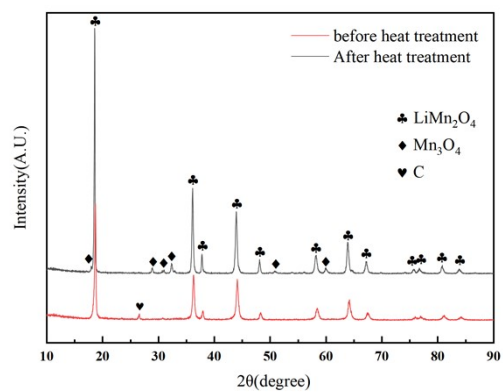

**Fig. S1.** XRD patterns of before and after heating cathode active materials.

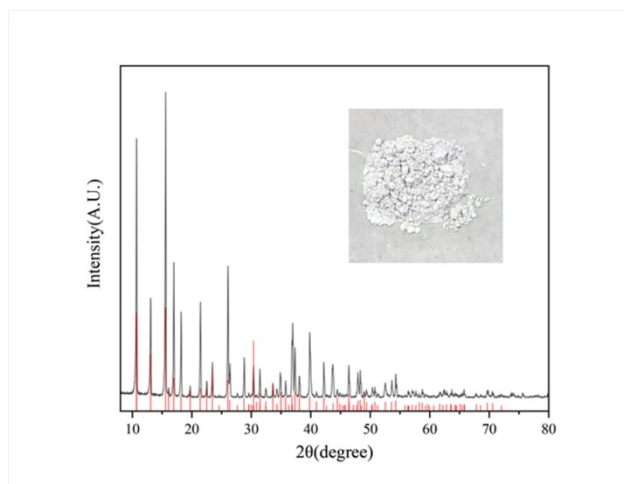

**Fig. S2.** XRD pattern of the white precipitate during leaching processes.

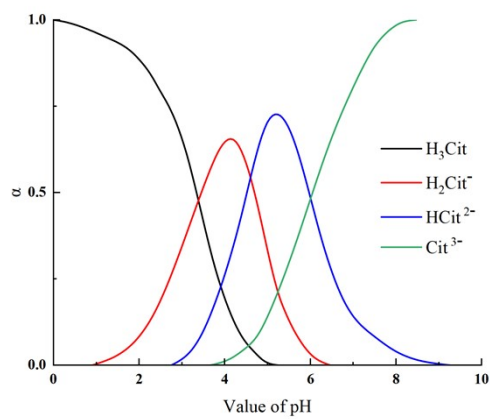

**Fig. S3.** The ionization of  $C_6H_8O_7$  at different pH values.

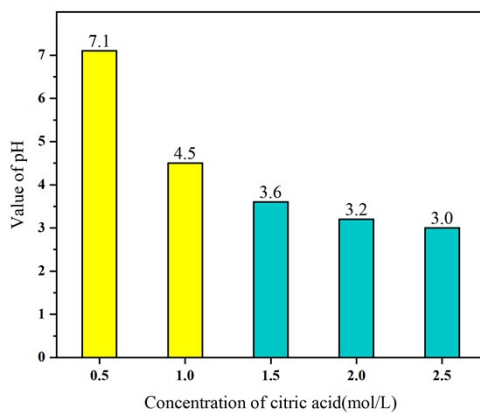

**Fig. S4** The pH values of leachate under different citric acid concentration. (leaching time of 60 min, pulp density = 60 g/L, temperature 50 °C)
